# Supplementary material for: Alterations in B cell subsets correlate with body composition parameters in female adolescents with anorexia nervosa
Source: PubMed Central journal article supplement (PMC7806719; doi:10.1038/s41598-020-80693-4), 2021-01-13
Supplement: 41598_2020_80693_MOESM1_ESM.pdf [file 41598_2020_80693_MOESM1_ESM.pdf]

### Alterations in B Cell Subsets Correlate with Body Composition Parameters in Female Adolescents with Anorexia Nervosa

Jana Freff <sup>1,2</sup>, Kathrin Schwarte <sup>1</sup>, Lisa Bröker <sup>1,2</sup>, Judith Bühlmeier <sup>3</sup>, Isabelle Kraft <sup>3</sup>, Dana Öztürk <sup>3</sup>, Anke Hinney <sup>3</sup>, Volker Arolt <sup>1</sup>, Udo Dannlowski <sup>1</sup>, Georg Romer <sup>4</sup>, Bernhard T. Baune <sup>1,5,6</sup>, Johannes Hebebrand <sup>3</sup>, Manuel Föcker <sup>3,4\*</sup>, Judith Alferink <sup>1,2\*</sup>

1 Department of Mental Health, University of Münster, 48149 Münster, Germany

2 Cells in Motion Interfaculty Cluster, University of Münster, 48149 Münster, Germany

3 Department of Child and Adolescent Psychiatry and Psychotherapy, University Hospital Essen, University of Duisburg-Essen, 45147 Essen, Germany

4 Department of Child and Adolescent Psychiatry and Psychotherapy, University Hospital Münster, 48149 Münster, Germany

5 The Florey Institute of Neuroscience and Mental Health, The University of Melbourne, 3010 Melbourne, Australia

6 Department of Psychiatry, The University of Melbourne, 3010 Melbourne, Australia

\* equal last authorship

Corresponding author:

Judith Alferink, [Judith.Alferink@ukmuenster.de](mailto:Judith.Alferink@ukmuenster.de); University of Münster, Department of Mental Health, Albert-Schweitzer-Campus 1, 48149 Münster, Germany

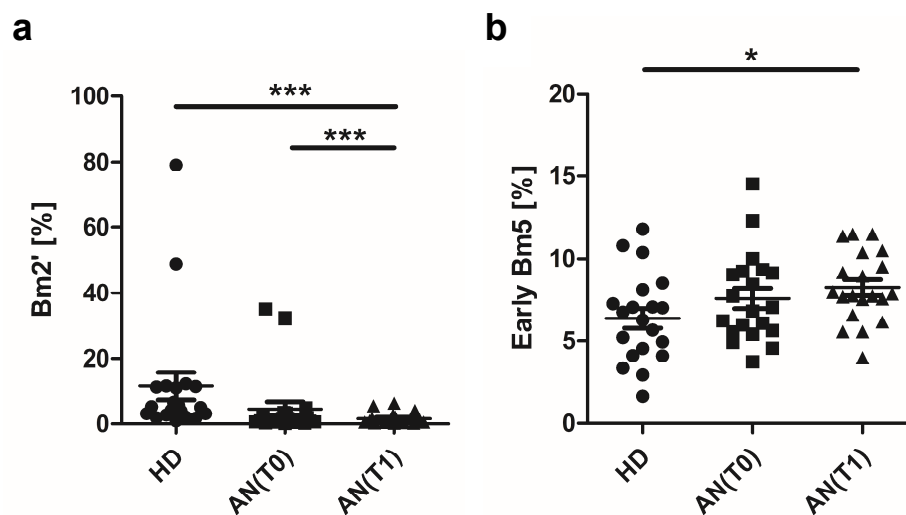

**Figure S1.** Mature B cell (Bm) subpopulations in PBMC of healthy controls (HC) and adolescents with anorexia nervosa (AN). Graphs displaying frequencies of (a) Bm2' cells and (b) early Bm5 cells in HC (n=20) and AN at T0 (n=20) and at T1 (n=20). *P*-values vs. HC were calculated by *t* test for independent samples, T0 vs. T1 by *t* test for paired samples, \**p*<0.05; \*\*\**p*<0.001.

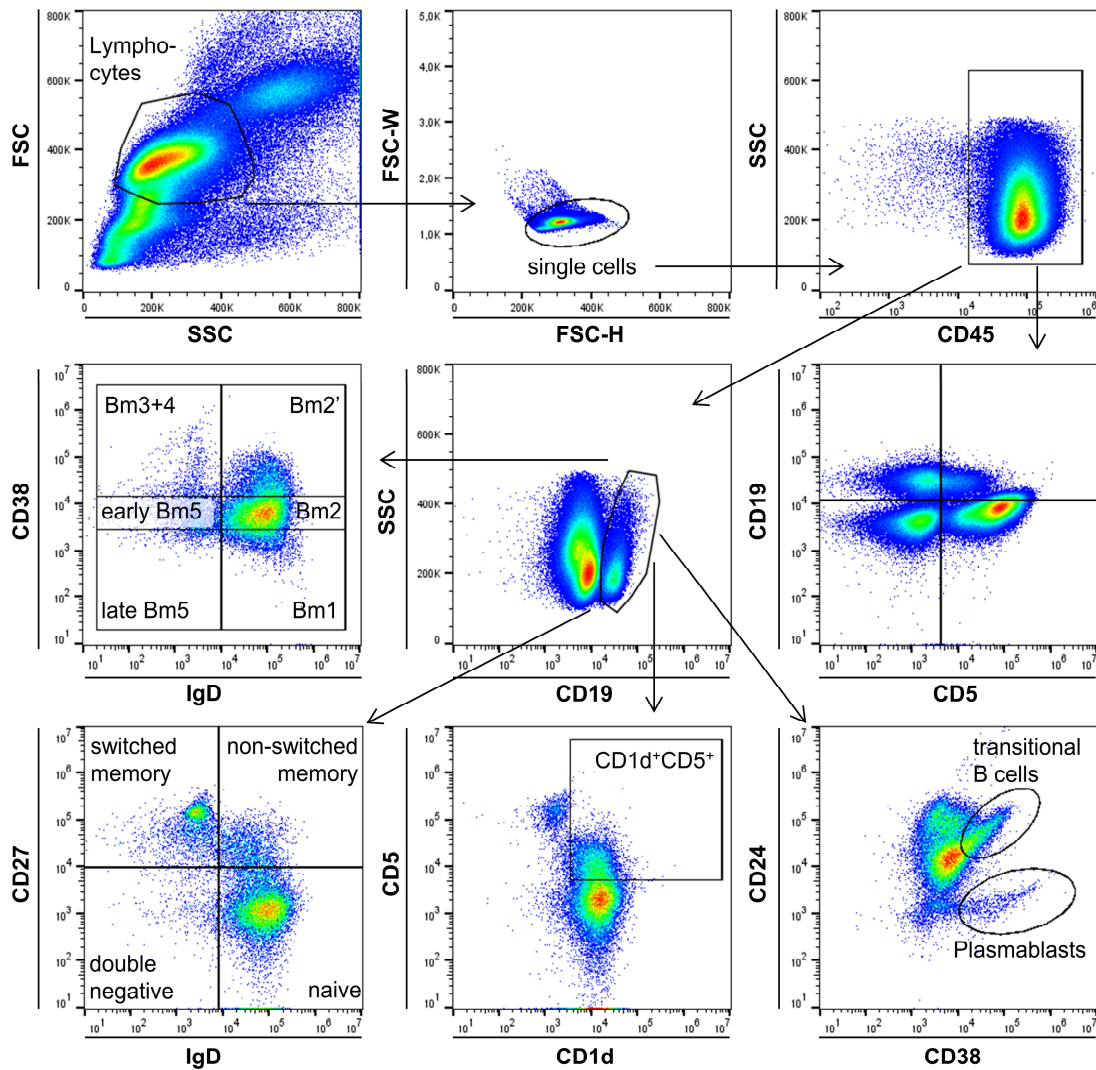

**Figure S2.** Exemplary gating strategy for phenotypic characterization of B cell subsets in adolescents with anorexia nervosa (AN) and healthy controls (HC). Lymphocytes from peripheral blood mononuclear cells (PBMC) were selected from total events based on their size (forward scatter [FSC]) and granularity (side scatter [SSC]). Single cells were gated based on FSC-Width vs FSC-Height information. Pre-gated on CD45<sup>+</sup> and CD19<sup>+</sup>, cells were further gated for transitional B cells (CD24<sup>high</sup>CD38<sup>+</sup>) and plasmablasts (CD24<sup>low</sup>CD38<sup>+</sup>), for CD1d<sup>+</sup>CD5<sup>+</sup> regulatory B cells, as well as for naive (IgD<sup>+</sup>CD27<sup>-</sup>), switched memory (IgD<sup>-</sup>CD27<sup>+</sup>), and non-switched memory B cells (IgD<sup>+</sup>CD27<sup>+</sup>). Additionally, B cells were subdivided into Bm1, Bm2, Bm2', Bm3+4 and early and late Bm5 cells based on CD38 vs. IgD expression.

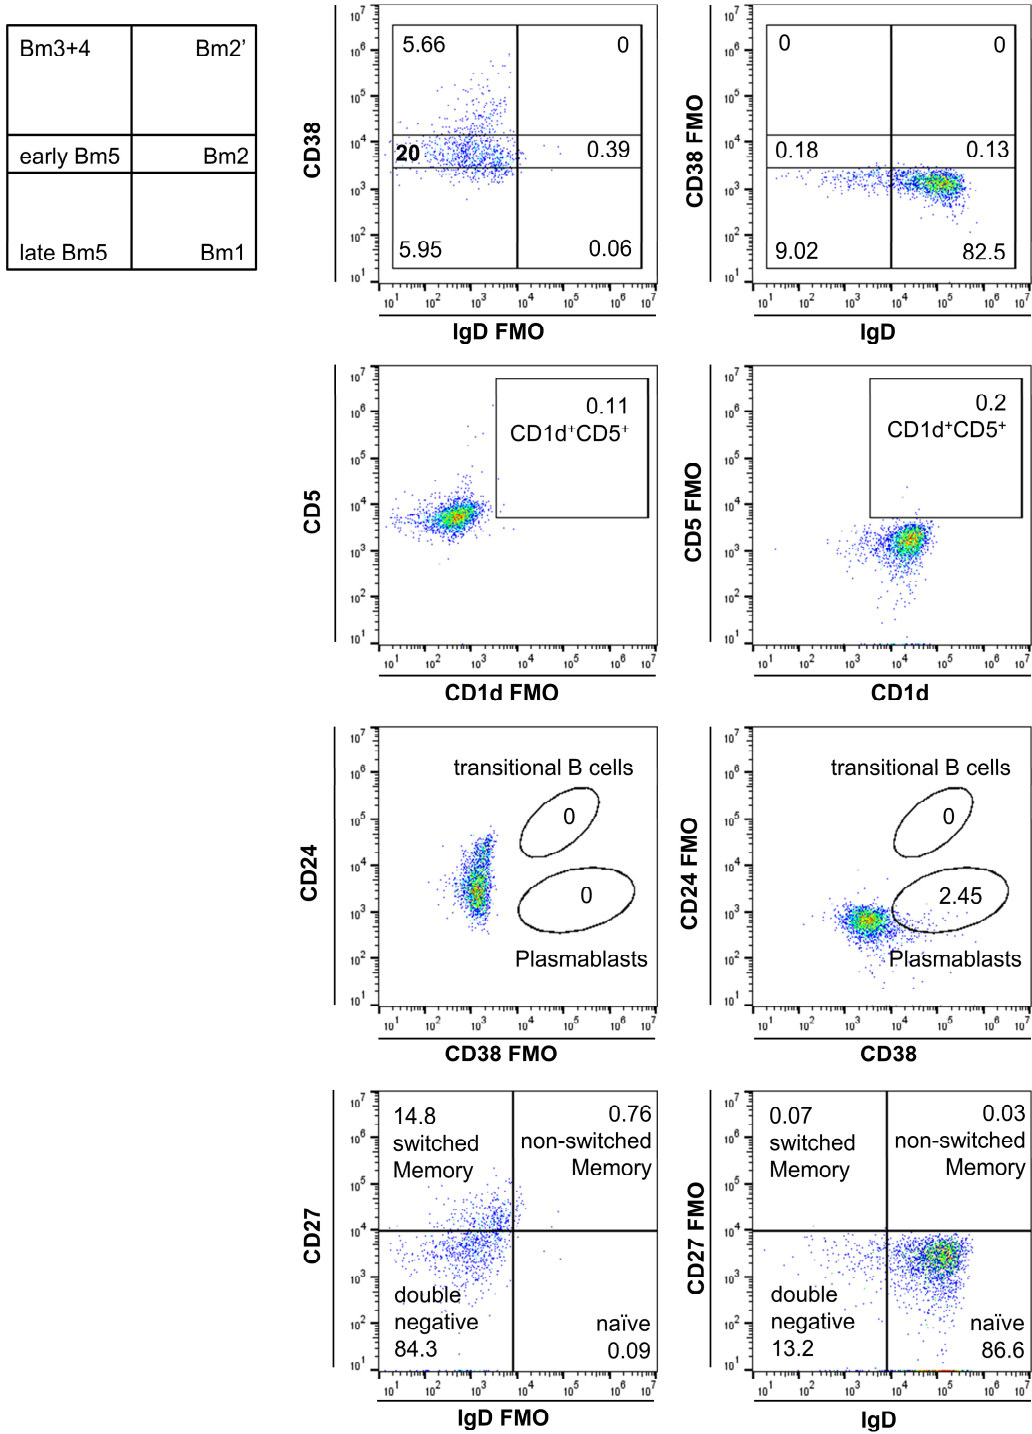

**Figure S3.** Representative fluorescence minus one (FMO) controls for the corresponding gating strategy.

**Table S1.** Clinical characteristics of patients with anorexia nervosa (AN) at T0.

|                                               | <b>AN (T0)</b>           |
|-----------------------------------------------|--------------------------|
|                                               | <b>(n=24)</b>            |
| Premorbid BMI (kg/m <sup>2</sup> , mean ± SD) | 20.4 ± 2.8 <sup>+</sup>  |
| Premorbid BMI percentile (mean ± SD)          | 45.2 ± 28.3 <sup>+</sup> |
| Premorbid BMI SDS (mean ± SD)                 | -0.1 ± 0.9 <sup>+</sup>  |
| Inpatient pretreatment (yes/no, n)            | 5/19                     |

<sup>+</sup>n=23; BMI: body mass index; SDS: standard deviation score.

**Table S2.** Correlation coefficients of immune parameters with clinical characteristics for HC, AN(T0) or AN(T1).

|                                            | HC (n=20)       |                |                          |               |                                 |                                  | AN(T0), (n=24)  |                |                          |               |                                 |                                  | AN(T1), (n=20)  |                |                          |              |                          |                           |
|--------------------------------------------|-----------------|----------------|--------------------------|---------------|---------------------------------|----------------------------------|-----------------|----------------|--------------------------|---------------|---------------------------------|----------------------------------|-----------------|----------------|--------------------------|--------------|--------------------------|---------------------------|
|                                            | BMI SDS (KIGGS) | BMI percentile | BMI [kg/m <sup>2</sup> ] | FM [%] (n=19) | FMI [kg/m <sup>2</sup> ] (n=19) | FFMI [kg/m <sup>2</sup> ] (n=19) | BMI SDS (KIGGS) | BMI percentile | BMI [kg/m <sup>2</sup> ] | FM [%] (n=23) | FMI [kg/m <sup>2</sup> ] (n=23) | FFMI [kg/m <sup>2</sup> ] (n=23) | BMI SDS (KIGGS) | BMI percentile | BMI [kg/m <sup>2</sup> ] | FM [%]       | FMI [kg/m <sup>2</sup> ] | FFMI [kg/m <sup>2</sup> ] |
| Lymphocytes                                | .121            | .135           | -.065                    | <b>-.460*</b> | -.396                           | .325                             | -.268           | -.268          | -.239                    | -.001         | .061                            | -.276                            | .046            | -.093          | .148                     | .052         | .008                     | .082                      |
| CD19 <sup>+</sup> B cells                  | -.218           | -.262          | -.107                    | .102          | .048                            | -.211                            | .122            | .122           | .123                     | .017          | .057                            | .296                             | .362            | .362           | .163                     | .159         | .178                     | .017                      |
| Naive B cells                              | -.037           | .032           | -.101                    | .301          | .219                            | -.405                            | .274            | .274           | .164                     | .105          | .175                            | -.087                            | .211            | .285           | .067                     | .183         | .134                     | -.080                     |
| Non-switched memory B cells                | -.002           | -.067          | .128                     | -.144         | -.095                           | .288                             | -.297           | -.297          | -.347                    | .223          | .072                            | -.311                            | -.218           | -.136          | -.001                    | .299         | .312                     | -.240                     |
| Switched memory B cells                    | .113            | .036           | .147                     | -.244         | -.154                           | .402                             | -.367           | -.367          | -.125                    | -.197         | -.172                           | .099                             | -.268           | -.283          | -.055                    | -.174        | -.163                    | .079                      |
| Plasmablasts                               | .245            | .245           | .338                     | .225          | .405                            | .180                             | -.029           | -.029          | -.161                    | -.208         | -.247                           | -.202                            | -.120           | -.120          | -.220                    | .047         | .120                     | -.099                     |
| Transitional B cells                       | -.262           | -.262          | -.087                    | .047          | .093                            | -.211                            | .119            | .119           | .050                     | .230          | .205                            | -.100                            | .435            | .435           | .305                     | -.012        | .021                     | <b>.477*</b>              |
| Late Bm5 cells                             | .173            | .198           | .118                     | -.121         | -.026                           | .226                             | -.175           | -.175          | .041                     | .066          | .128                            | .181                             | -.340           | -.444          | -.112                    | .143         | .144                     | -.194                     |
| CD1d <sup>+</sup> CD5 <sup>+</sup> B cells | .037            | .067           | .082                     | .171          | .155                            | -.061                            | .213            | .213           | -.087                    | <b>.456*</b>  | <b>.474*</b>                    | -.003                            | <b>.485*</b>    | .421           | .178                     | .253         | .288                     | -.052                     |
| CD5 MFI on transitional B cells            | .200            | .243           | .097                     | .032          | .081                            | .056                             | .190            | .190           | .165                     | <b>.438*</b>  | <b>.428*</b>                    | -.052                            | .405            | .168           | .159                     | <b>.557*</b> | <b>.568**</b>            | -.303                     |

#n=19, \*n=23; HC: healthy control; AN: Anorexia nervosa; BMI: body mass index; SDS: standard deviation score; KIGGS: German Health Interview and Examination Survey for Children and Adolescents; FM: fat mass; FMI: fat mass index; FFMI: fat free mass index; italics show Spearman Rho correlation coefficients, otherwise correlation is given according to Pearson; bold printed values mark significant correlations; \* $p < .05$ ; \*\* $p < .01$ .

**Table S3.** Contraceptive, supplements and medication of patients with AN at T0 and T1.

|                                                  | <b>AN(T0)</b> | <b>AN(T1)</b> |
|--------------------------------------------------|---------------|---------------|
| <b>Oral contraceptive</b>                        | 3             | 3             |
| <b>Supplements</b>                               |               |               |
| Vitamin D                                        | 3             | 9             |
| Nutritional drink (Fresubin)                     | 2             | 2             |
| Sodium glycerophosphate                          | 1             | 0             |
| Magnesium                                        | 0             | 2             |
| <b>Benzodiazepine</b>                            | 1             | 0             |
| <b>Phenothiazine</b> (Promethazine)              | 0             | 1             |
| <b>Domperidone</b>                               | 1             | 1             |
| <b>SSRI</b>                                      | 0             | 1             |
| <b>Antipsychotic drug</b> (Quetiapine, low dose) | 0             | 2             |
| <b>Antibiotics</b> (Flucloxacillin)              | 0             | 1             |

**Table S4.** Antibodies used for extracellular staining.

| <b>Specificity</b> | <b>Fluorochrome</b> | <b>Clone</b> |
|--------------------|---------------------|--------------|
| CD1d               | PE                  | 51.1         |
| CD5                | APC                 | UCHT2        |
| CD19               | PerCP               | HIB19        |
| CD24               | BV510               | ML5          |
| CD27               | PE-Cy7              | M-T271       |
| CD38               | BV421               | HIT2         |
| CD45               | APC-Cy7             | HI30         |
| IgD                | FITC                | IA6-2        |
